# Supplementary material for: Soil Physicochemical Properties Variation under Annual Crop and Coffee Landuse in the Chentale Watershed, Upper Blue Nile Basin, Ethiopia
Source: Hindawi journal article supplement (doi:10.1155/2024/2921614), 2024-02-06
Supplement: f1 [file 2921614.f1.docx]

| **Variable Type** | **Variable Name** | **Study report** |
| --- | --- | --- |
| Experimental/ sampling set-up | Start & end date of study | July 2017 – October 2018 |
| Start & end dates of any interventions/treatments | No intervention |
| Dates/frequency that measurements were taken | January 18 – 25, 2018 |
| Size & shape of experimental units (e.g. subplot/plot/field/farm) | 20x20 m plot on both land use |
| Experimental/sampling designs (e.g. blocked/randomised, distance between plots) | Randomized sampling technique for selected the study area and land |
| Number of replicates | 6 |
| Study Site | Co-ordinates & co-ordinate system (e.g. WGS84)a | 10°45'3" to 10°47'3" North latitude and 37°3'0 to37°6'0"East longitude |
| Country | Ethiopia |
| Site map | Figure 1 |
| Elevation | 2232-2637masl |
| Slope & aspect | West |
| Weather during study period | Dry season |
| Extreme/atypical events (e.g. flooding, fire, pest outbreak) | Erosion on cropland is common during the rainy season |
| Farm/crop/livestock certification/scheme (e.g. Organic) | Not recorded |
| Artificial structure (e.g. open vs polytunnel, barn vs field) | A two year physical and biological conservation structure on the cropland |
| Landscape context (e.g. field-edge management, proximity to forest) | Eucalyptus patch is found 50 m away from cropland, which is at the foot slope |
| Previous land use type & timing of transition (e.g. if converted from forest) | The cropland was converted from forest before 5 decades and Wheat and *Teff* are commonly cultivated interchangeably throughout the main cropping season (June – December). Coffee land use was converted from cereal cropping nearly before 5-10 years. |
| Soil | Soil type & soil system (e.g. USDA) | Vertisol |
| Soil texture (silt, sand, clay) | Clay and clay loam |
| Soil pH | Slightly acidic to neutral |
| Soil organic matter | Low to Medium |
| Livestock management | Livestock species & breed (including managed pollinators) | Not applicable |
| Livestock grazing management (including density, timing, rotations) | The cropland is open for grazing after harvesting |
| Livestock feeding regime (e.g. free grazing/supplemental) | Grazing |
| Livestock agrochemicals type, rate & timing (list all) (including medicines) | Not applicable |
| Livestock demography (e.g. lifestage/sex) | Not applicable |
| Crop & grassland management | Crop species & variety (including main crops, secondary crops & non-cash-crops) | Wheat, and *Teff* on cropland and che Coffee landuse consists of fruit crops (avocado), evergreen *C. africana*, and *Croton macrostachyus* trees |
| Crop planting density & arrangement (e.g. broadcast/inter-row) | The cereal crops planted via broadcast method. Coffee trees are irregularly intercropped with fruits and other trees. |
| Crop planting/harvesting timing (including rotations) | The cereal crops are regularly harvested in December to January. And coffee is harvested in the dry season from November to February |
| Cultivation method, depth, & timing | Oxen ploughing (<20cm depth) for the croplands and about 30 cm depth by man to the coffee land use. |
| Mowing/topping method, height & timing | Removing from roots |
| Weeding method & timing | August –September |
| Physical control of animal pests (e.g. trapping) method & timing | The coffee land is fenced, protecting animal entry from cropland |
| Biological control agent species, release rate & timing | Not applicable |
| Irrigation method, rate & timing | Manual application of water to the coffee |
| Fertiliser type, rate & timing (list all) | DAP/urea at the time sowing for cereal cropland and mulching for coffee cropland |
| Crop protection chemicals type, rate & timing (list all) | Herbicide |
| Other chemicals type, rate & timing (list all) | Not recorded |
| Outputs | Yield | Not recorded |
| Quality and/or Commercial grade | Not recorded |
| Finances | Any available costs/profits (eg interventions, management) | $1400 (2018 USD) |

Source of the checklist: AgroEcoList 1.0. https://doi.org/10.1371/journal.pone.0285478
